# Supplementary material for: Outcomes of Atrial Arrhythmia Surgery in Patients With Congenital Heart Disease: A Systematic Review
Source: PubMed Central journal article supplement — J Am Heart Assoc. 2020 Sep 25;9(19):e016921. doi: 10.1161/JAHA.120.016921 (PMC7792370; doi:10.1161/jaha.120.016921), 2020-09-25
Supplement: JAH3-9-e016921-s001.pdf [file JAH3-9-e016921-s001.pdf]

# **SUPPLEMENTAL MATERIAL**

## Data S1.

### Complete search strategy

Date of search: 20-11-2019

Outcomes of atrial arrhythmia surgery in patients with congenital heart disease.

| Database searched                              | via              | Years of coverage | References  | After de-duplication |
|------------------------------------------------|------------------|-------------------|-------------|----------------------|
| Embase                                         | Embase.com       | 1971 - Present    | 1594        | 1573                 |
| Medline ALL                                    | Ovid             | 1946 - Present    | 1454        | 326                  |
| Web of Science Core Collection                 | Web of Knowledge | 1975 - Present    | 842         | 121                  |
| Cochrane Central Register of Controlled Trials | Wiley            | 1992 - Present    | 90          | 61                   |
| Other sources: Google Scholar                  |                  |                   | 200         | 93                   |
| <b>Total</b>                                   |                  |                   | <b>4180</b> | <b>2174</b>          |

#### Embase, 1594

('congenital heart disease'/de OR 'congenital heart malformation'/exp OR (fontan\* OR ((atriatr\* OR dextro\*) NEAR/3 (cor\* OR heart\* OR cardiac\*)) OR dextrocard\* OR ebstein\* OR fallot\* OR ((congen\* OR anomal\* OR malform\* OR defect\*) NEAR/12 (heart\* OR septa\* OR septum\* OR ventricle\*)) OR ((heart\*) NEAR/6 (shunt\* OR hypoplastic\*) NEAR/6 (left OR right))):ab,ti,kw) AND ('maze procedure'/de OR 'maze surgery'/de OR 'cox maze procedure'/de OR (('supraventricular tachycardia' OR 'reentry tachycardia'/exp OR 'atrial fibrillation'/exp OR 'reentry arrhythmia'/de OR 'heart atrium arrhythmia'/exp) AND ('ablation therapy'/exp) AND ('Fontan procedure'/exp OR 'surgery'/de OR 'heart surgery'/exp OR 'cryosurgery'/de)) OR (((surger\* OR surgi\* OR fontan) NEAR/8 (tachyarrhythm\* OR dysrhythm\* OR disrhythm\* OR flutter\* OR tachycardi\* OR fibrillation\* OR arrhythm\*)) OR maze\*):ab,ti,kw) NOT ([Conference Abstract]/lim) NOT ([animals]/lim NOT [humans]/lim)

#### Medline(Ovid), 1454

(exp "Heart Defects, Congenital"/ OR (fontan\* OR ((atriatr\* OR dextro\*) ADJ3 (cor\* OR heart\* OR cardiac\*)) OR dextrocard\* OR ebstein\* OR fallot\* OR ((congen\* OR anomal\* OR

malform\* OR defect\*) ADJ12 (heart\* OR septa\* OR septum\* OR ventricle\*)) OR ((heart\*) ADJ6 (shunt\* OR hypoplastic\*) ADJ6 (left OR right)).ab,ti,kw.) **AND** (((exp "Tachycardia, Supraventricular"/ OR "Atrial Fibrillation"/ OR "Atrial Flutter"/) **AND** ("Ablation Techniques"/) **AND** ("Fontan Procedure"/ OR exp "Surgical Procedures, Operative"/ OR "Thoracic Surgery"/ OR "Cryosurgery"/)) OR (((surger\* OR surgi\* OR fontan) ADJ8 (tachyarrhythm\* OR dysrhythm\* OR disrhythm\* OR flutter\* OR tachycardi\* OR fibrillation\* OR arrhythm\*)) OR maze\*).ab,ti,kw.) **NOT** (news OR congres\* OR abstract\* OR book\* OR chapter\* OR dissertation abstract\*).pt. **NOT** (exp animals/ NOT humans/)

### **Web-of-Science Core Collection, 842**

TS=(((fontan\* OR ((atriat\* OR dextro\*) NEAR/2 (cor\* OR heart\* OR cardiac\*)) OR dextrocard\* OR ebstein\* OR fallot\* OR ((congen\* OR anomal\* OR malform\* OR defect\*) NEAR/12 (heart\* OR septa\* OR septum\* OR ventricle\*)) OR ((heart\*) NEAR/5 (shunt\* OR hypoplastic\*) NEAR/5 (left OR right)))) **AND** (((surger\* OR surgi\* OR fontan) **NEAR/8** (tachyarrhythm\* OR dysrhythm\* OR disrhythm\* OR flutter\* OR tachycardi\* OR fibrillation\* OR arrhythm\*)) OR maze\*) **NOT** ((animal\* OR rat OR rats OR mouse OR mice OR murine OR dog OR dogs OR canine OR cat OR cats OR feline OR rabbit OR cow OR cows OR bovine OR rodent\* OR sheep OR ovine OR pig OR swine OR porcine OR veterinar\* OR chick\* OR zebrafish\* OR baboon\* OR nonhuman\* OR primate\* OR cattle\* OR goose OR geese OR duck OR macaque\* OR avian\* OR bird\* OR fish\*) **NOT** (human\* OR patient\* OR women OR woman OR men OR man))) **AND** DT=(article OR review)

### **Cochrane, 90 (1 cochrane review, trials 89)**

((fontan\* OR ((atriat\* OR dextro\*) NEAR/3 (cor\* OR heart\* OR cardiac\*)) OR dextrocard\* OR ebstein\* OR fallot\* OR ((congen\* OR anomal\* OR malform\* OR defect\*) NEAR/12 (heart\* OR septa\* OR septum\* OR ventricle\*)) OR ((heart\*) NEAR/6 (shunt\* OR hypoplastic\*) NEAR/6 (left OR right))):ab,ti,kw) **AND** (((surger\* OR surgi\* OR fontan) **NEAR/8** (tachyarrhythm\* OR dysrhythm\* OR disrhythm\* OR flutter\* OR tachycardi\* OR fibrillation\* OR arrhythm\*)) OR maze\*):ab,ti,kw)

### **Google Scholar, 200**

"congenital heart disease" arrhythmia|arrhythmias surgery|surgical
